# Supplementary material
Source: PubMed Central journal article supplement (PMC8117521)
Supplement: JB.00643-20-s0001.pdf [file JB.00643-20-s0001.pdf]

## Supplementary Information

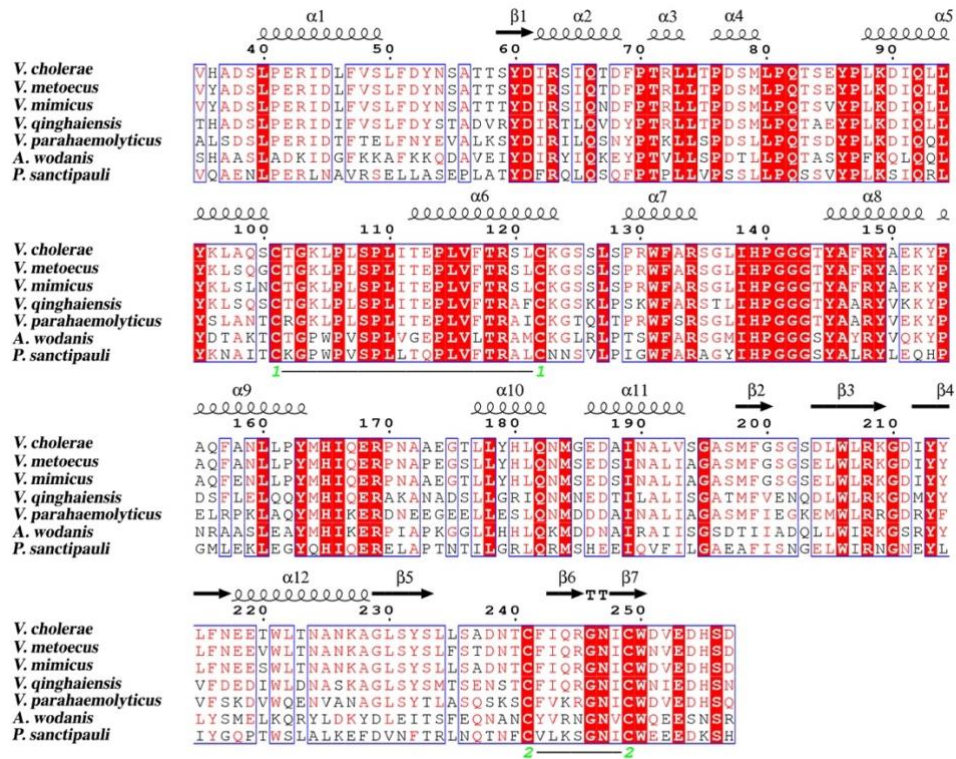

**Figure S1.** Structure-based multiple sequence alignment of VxrA-SD and its homologs.

The sequences of SDs of *Vibrio cholerae* (NP\_232955.1), *Vibrio metoecus* (KQA20136.1), *Vibrio mimicus* (EEY46071.1), *Vibrio qinghaiensis* (WP\_094501440.1), *Vibrio parahaemolyticus* (WP\_025533427.1), *Aliivibrio wodanis* (WP\_045104543.1) and *Photobacterium sanctipauli* (WP\_036817922.1) were used in the alignment. The  $\alpha$ -helices and  $\beta$ -strands are marked with coils and arrows, respectively, above the appropriate sequences of *Vibrio cholerae* VxrA-SD based on its structure. The alignment was generated with the programs MultAlin (1) and ESPrpt (2) and was modified slightly for clarity.

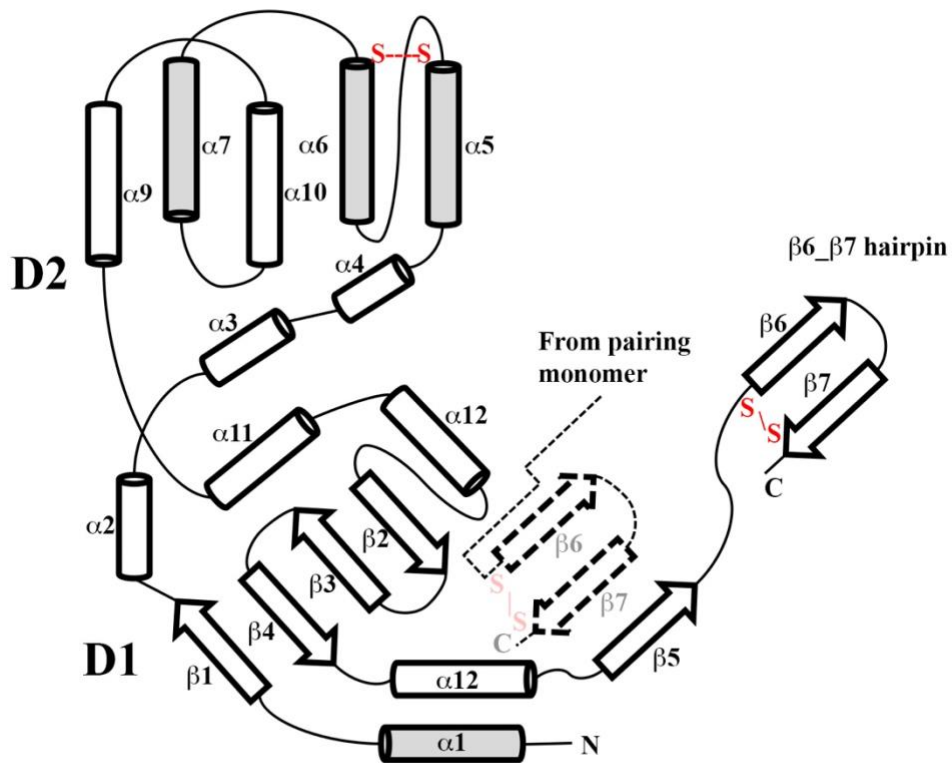

**Figure S2.** The scheme of VxrA-SD structure. In the diagram,  $\beta$  strands are represented by arrows and  $\alpha$  helices are represented by cylinders. The red S-S labels show the locations of disulfide bonds.

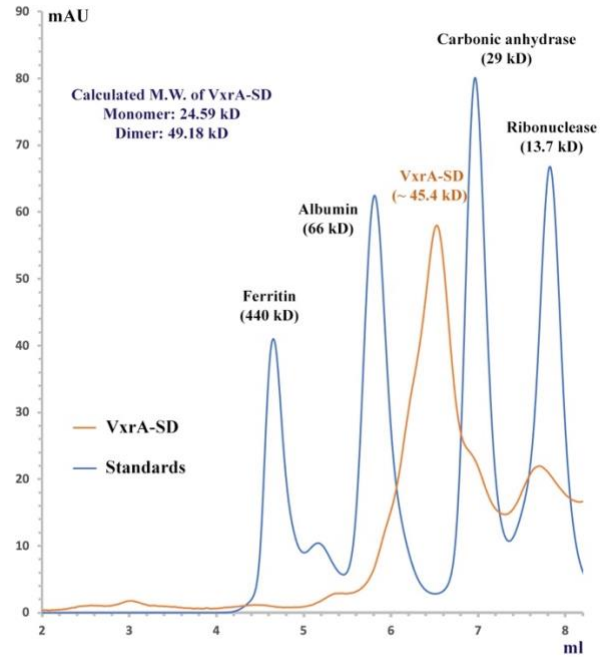

**Figure S3.** Size exclusion chromatography of VxrA-SD. Predominant species of VxrA-SD migrates on the gel with the apparent molecular mass of about 45.4 kD, which is consistent with that of a VxrA-SD dimer. mAU is milli-absorbance unit.

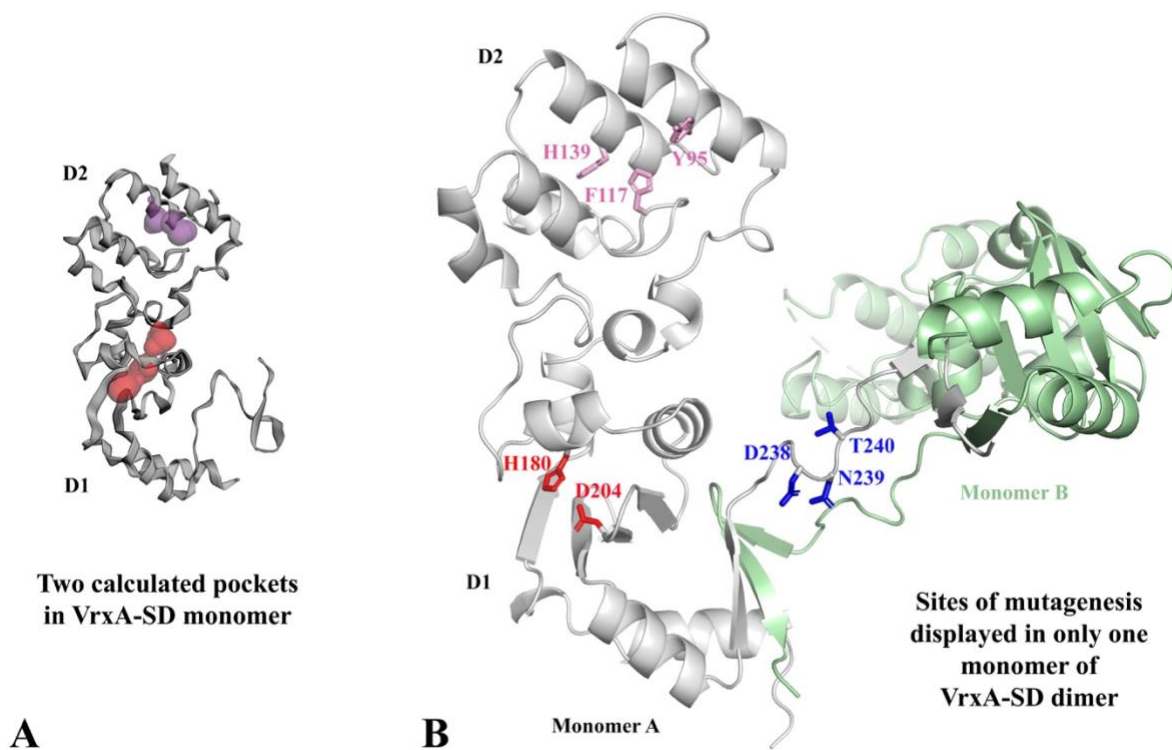

**Figure S4.** Potential binding pockets of signaling molecule and targets of mutagenesis. (A) Two major pockets of VrxA-SD based on the calculation with the program CASTp (3). (B) Sites of mutagenesis. The sites of some prominent pocket-forming residues selected for mutagenesis study are colored in pink or red. Those residues targeted in  $\beta$ -linker-shortening mutagenesis are colored in blue. All targeted residues are shown in stick format in only one monomer of VrxA-SD dimer.

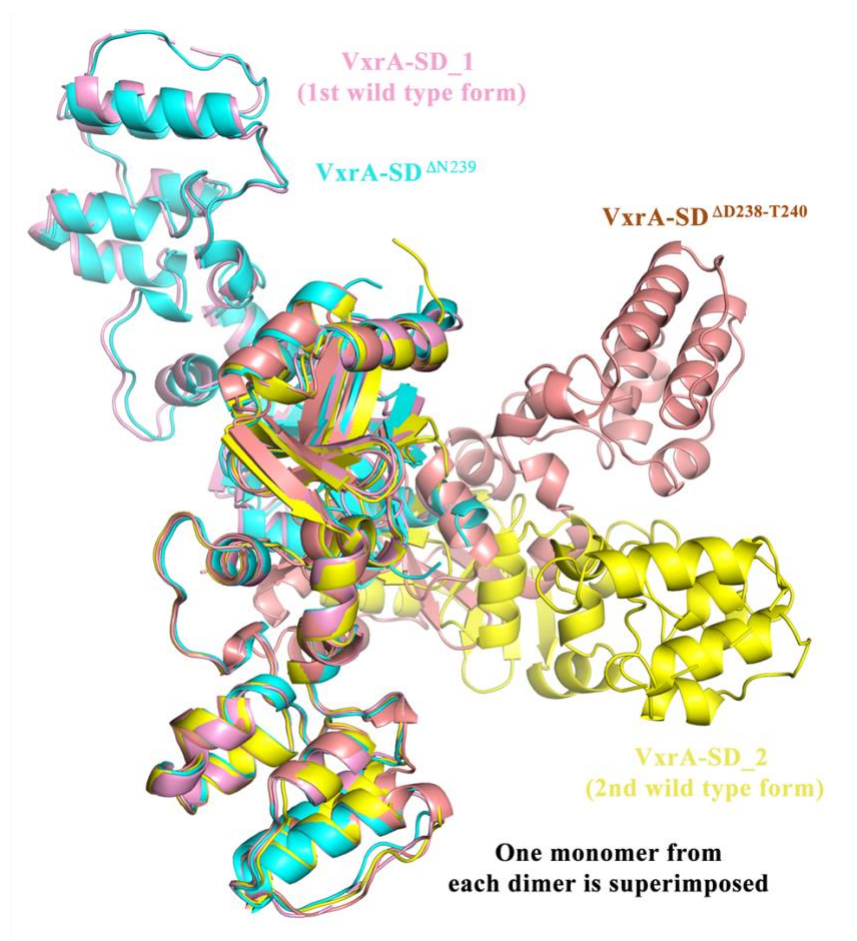

**Figure S5.** Conformational changes of VxrA-SD dimer. The dimers of two wild types, VxrA-SD\_1 and VxrA-SD\_2, and the dimers of two mutants, VxrA-SD<sup>ΔN239</sup> and VxrA-SD<sup>ΔD238-T240</sup> are superimposed with one monomer of each dimer. For clarity, VxrA-SD<sup>ΔN239-T240</sup> dimer that is nearly identical to VxrA-SD<sup>ΔN239</sup> dimer in conformation is not included in the alignment. The relative positions (rotation) of their second monomer illustrate the conformational changes of VxrA-SD dimer. The wild type VxrA-SD\_2 has the largest relative conformational change in comparison to VxrA-SD\_1 while VxrA-SD<sup>ΔD238-T240</sup> shows an intermedium conformational change.

**Table S1. Bacterial strains and plasmids used in this study.**

| Strain or plasmid          | Relevant genotype                                                                                                                                                  | Source     |
|----------------------------|--------------------------------------------------------------------------------------------------------------------------------------------------------------------|------------|
| <i>E. coli</i> strains     |                                                                                                                                                                    |            |
| CC118 $\lambda$ pir        | $\Delta(\text{ara-leu})$ <i>araD</i> $\Delta\text{lacX74}$ <i>galE galK phoA20 thi-1 rpsE rpoB argE(Am) recA1</i> $\lambda$ pir                                    | (4)        |
| S17-1 $\lambda$ pir        | Tp <sup>f</sup> Sm <sup>r</sup> 6ec <i>Athi pro</i> r <sub>K</sub> <sup>-</sup> m <sub>K</sub> <sup>+</sup> RP4::2-Tc::MuKm Tn7 $\lambda$ pir                      | (5)        |
| <i>V. cholerae</i> strains |                                                                                                                                                                    |            |
| FY_VC_9332                 | <i>Vibrio cholerae</i> O1 El Tor A1552, $\Delta\text{vxrA}$                                                                                                        | (6)        |
| FY_VC_14821                | <i>Vibrio cholerae</i> O1 El Tor A1552, $\Delta\text{vxrA}$ , Tn7:: <i>vxrA</i> <sup>MH</sup> , Rif <sup>r</sup>                                                   | This study |
| FY_VC_14823                | <i>Vibrio cholerae</i> O1 El Tor A1552, $\Delta\text{vxrA}$ , Tn7:: <i>vxrA</i> <sup>MH, C241AC249A</sup> , Rif <sup>r</sup>                                       | This study |
| FY_VC_14825                | <i>Vibrio cholerae</i> O1 El Tor A1552, $\Delta\text{vxrA}$ , Tn7:: <i>vxrA</i> <sup>MH, C101AC122A</sup> , Rif <sup>r</sup>                                       | This study |
| FY_VC_14824                | <i>Vibrio cholerae</i> O1 El Tor A1552, $\Delta\text{vxrA}$ , Tn7:: <i>vxrA</i> <sup>MH, <math>\Delta</math>N239-T240</sup> , Rif <sup>r</sup>                     | This study |
| FY_VC_14826                | <i>Vibrio cholerae</i> O1 El Tor A1552, $\Delta\text{vxrA}$ , Tn7:: <i>vxrA</i> <sup>MH, <math>\Delta</math>D238-T240</sup> , Rif <sup>r</sup>                     | This study |
| FY_VC_14827                | <i>Vibrio cholerae</i> O1 El Tor A1552, $\Delta\text{vxrA}$ , Tn7:: <i>vxrA</i> <sup>MH, <math>\Delta</math>N239</sup> , Rif <sup>r</sup>                          | This study |
| FY_VC_14828                | <i>Vibrio cholerae</i> O1 El Tor A1552, $\Delta\text{vxrA}$ , Tn7:: <i>vxrA</i> <sup>MH, Y95A</sup> , Rif <sup>r</sup>                                             | This study |
| FY_VC_14830                | <i>Vibrio cholerae</i> O1 El Tor A1552, $\Delta\text{vxrA}$ , Tn7:: <i>vxrA</i> <sup>MH, F117A</sup> , Rif <sup>r</sup>                                            | This study |
| FY_VC_14832                | <i>Vibrio cholerae</i> O1 El Tor A1552, $\Delta\text{vxrA}$ , Tn7:: <i>vxrA</i> <sup>MH, H180A</sup> , Rif <sup>r</sup>                                            | This study |
| FY_VC_14831                | <i>Vibrio cholerae</i> O1 El Tor A1552, $\Delta\text{vxrA}$ , Tn7:: <i>vxrA</i> <sup>MH, D204A</sup> , Rif <sup>r</sup>                                            | This study |
| FY_VC_14829                | <i>Vibrio cholerae</i> O1 El Tor A1552, $\Delta\text{vxrA}$ , Tn7:: <i>vxrA</i> <sup>MH, H139A</sup> , Rif <sup>r</sup>                                            | This study |
| FY_VC 14470                | <i>Vibrio cholerae</i> O1 El Tor A1552, $\Delta\text{vxrA}$ $\Delta\text{lacZ-vpsLp}::\text{lacZ}$ pBAD Rif <sup>r</sup>                                           | This study |
| FY_VC 15724                | <i>Vibrio cholerae</i> O1 El Tor A1552, $\Delta\text{vxrA}$ $\Delta\text{lacZ-vpsLp}::\text{lacZ}$ pBAD- <i>vxrA</i> <sup>MH</sup> , Rif <sup>r</sup>              | This study |
| FY_VC 15726                | <i>Vibrio cholerae</i> O1 El Tor A1552, $\Delta\text{vxrA}$ $\Delta\text{lacZ-vpsLp}::\text{lacZ}$ pBAD- <i>vxrA</i> <sup>MH, C241A/C249A</sup> , Rif <sup>r</sup> | This study |

|             |                                                                                                                                                                         |                                  |
|-------------|-------------------------------------------------------------------------------------------------------------------------------------------------------------------------|----------------------------------|
| FY_VC 15725 | <i>Vibrio cholerae</i> O1 El Tor A1552, $\Delta vxrA$<br>$\Delta lacZ-vpsLp::lacZ$ pBAD- <i>vxrA</i> <sup>MH</sup> ,<br>C101A/C122A, Rif <sup>r</sup>                   | This study                       |
| FY_VC 15728 | <i>Vibrio cholerae</i> O1 El Tor A1552, $\Delta vxrA$<br>$\Delta lacZ-vpsLp::lacZ$ pBAD- <i>vxrA</i> <sup>MH, <math>\Delta N239-T240</math></sup> ,<br>Rif <sup>r</sup> | This study                       |
| FY_VC 15729 | <i>Vibrio cholerae</i> O1 El Tor A1552, $\Delta vxrA$<br>$\Delta lacZ-vpsLp::lacZ$ pBAD- <i>vxrA</i> <sup>MH, <math>\Delta D238-T240</math></sup> ,<br>Rif <sup>r</sup> | This study                       |
| FY_VC 15727 | <i>Vibrio cholerae</i> O1 El Tor A1552, $\Delta vxrA$<br>$\Delta lacZ-vpsLp::lacZ$ pBAD- <i>vxrA</i> <sup>MH, <math>\Delta N239</math></sup> , Rif <sup>r</sup>         | This study                       |
| FY_VC 15730 | <i>Vibrio cholerae</i> O1 El Tor A1552, $\Delta vxrA$<br>$\Delta lacZ-vpsLp::lacZ$ pBAD- <i>vxrA</i> <sup>MH, Y95A</sup> , Rif <sup>r</sup>                             | This study                       |
| FY_VC 15731 | <i>Vibrio cholerae</i> O1 El Tor A1552, $\Delta vxrA$<br>$\Delta lacZ-vpsLp::lacZ$ pBAD- <i>vxrA</i> <sup>MH, F117A</sup> , Rif <sup>r</sup>                            | This study                       |
| FY_VC 15733 | <i>Vibrio cholerae</i> O1 El Tor A1552, $\Delta vxrA$<br>$\Delta lacZ-vpsLp::lacZ$ pBAD- <i>vxrA</i> <sup>MH, H180A</sup> , Rif <sup>r</sup>                            | This study                       |
| FY_VC 15734 | <i>Vibrio cholerae</i> O1 El Tor A1552, $\Delta vxrA$<br>$\Delta lacZ-vpsLp::lacZ$ pBAD- <i>vxrA</i> <sup>MH, D204A</sup> , Rif <sup>r</sup>                            | This study                       |
| FY_VC 15732 | <i>Vibrio cholerae</i> O1 El Tor A1552, $\Delta vxrA$<br>$\Delta lacZ-vpsLp::lacZ$ pBAD- <i>vxrA</i> <sup>MH, H139A</sup> , Rif <sup>r</sup>                            | This study                       |
| Plasmids    |                                                                                                                                                                         |                                  |
| pUX-BF13    | oriR6K helper plasmid, <i>mob/oriT</i> , provides<br>the Tn7 transposition function in <i>trans</i> , Ap <sup>r</sup>                                                   | (7)                              |
| pMCM11      | pGP704::mTn7- <i>gfp</i> , Gm <sup>r</sup> Ap <sup>r</sup>                                                                                                              | M. Miller<br>and G.<br>Schoolnik |
| pFY-6334    | pGP704-Tn7- <i>vxrA</i> <sup>MH</sup> , Gm <sup>r</sup> , Ap <sup>r</sup>                                                                                               | This study                       |
| pFY-6335    | pGP704-Tn7- <i>vxrA</i> <sup>MH, C241A/C249A</sup> , Gm <sup>r</sup> , Ap <sup>r</sup> .                                                                                | This study                       |
| pFY-6337    | pGP704-Tn7- <i>vxrA</i> <sup>MH, C101A/C122A</sup> , Gm <sup>r</sup> , Ap <sup>r</sup> .                                                                                | This study                       |
| pFY-6336    | pGP704-Tn7- <i>vxrA</i> <sup>MH, <math>\Delta N239-T240</math></sup> , Gm <sup>r</sup> , Ap <sup>r</sup> .                                                              | This study                       |
| pFY-6338    | pGP704-Tn7- <i>vxrA</i> <sup>MH, <math>\Delta D238-T240</math></sup> , Gm <sup>r</sup> , Ap <sup>r</sup> .                                                              | This study                       |
| pFY-6339    | pGP704-Tn7- <i>vxrA</i> <sup>MH, <math>\Delta N239</math></sup> , Gm <sup>r</sup> , Ap <sup>r</sup> .                                                                   | This study                       |
| pFY-6340    | pGP704-Tn7- <i>vxrA</i> <sup>MH, Y95A</sup> , Gm <sup>r</sup> , Ap <sup>r</sup> .                                                                                       | This study                       |
| pFY-6342    | pGP704-Tn7- <i>vxrA</i> <sup>MH, F117A</sup> , Gm <sup>r</sup> , Ap <sup>r</sup> .                                                                                      | This study                       |
| pFY-6344    | pGP704-Tn7- <i>vxrA</i> <sup>MH, H180A</sup> , Gm <sup>r</sup> , Ap <sup>r</sup> .                                                                                      | This study                       |
| pFY-6343    | pGP704-Tn7- <i>vxrA</i> <sup>MH, D204A</sup> , Gm <sup>r</sup> , Ap <sup>r</sup> .                                                                                      | This study                       |

|            |      |                                                                                    |            |
|------------|------|------------------------------------------------------------------------------------|------------|
| pFY-6341   |      | pGP704-Tn7- <i>vxrA</i> <sup>MH, H139A</sup> , Gm <sup>r</sup> , Ap <sup>r</sup> , | This study |
| pBAD/myc B | His- | Arabinose-inducible expression vector with C-terminal myc epitope and six-His tags |            |
| pFY-6417   |      | pBAD- <i>vxrA</i> <sup>MH</sup> , Ap <sup>r</sup>                                  | This study |
| pFY-6419   |      | pBAD- <i>vxrA</i> <sup>MH, C241A/C249A</sup> , Ap <sup>r</sup> ,                   | This study |
| pFY-6418   |      | pBAD- <i>vxrA</i> <sup>MH, C101A/C122A</sup> , Ap <sup>r</sup> ,                   | This study |
| pFY-6421   |      | pBAD- <i>vxrA</i> <sup>MH, ΔN239-T240</sup> , Ap <sup>r</sup> ,                    | This study |
| pFY-6422   |      | pBAD- <i>vxrA</i> <sup>MH, ΔD238-T240</sup> , Ap <sup>r</sup> ,                    | This study |
| pFY-6420   |      | pBAD- <i>vxrA</i> <sup>MH, ΔN239</sup> , Ap <sup>r</sup> ,                         | This study |
| pFY-6423   |      | pBAD- <i>vxrA</i> <sup>MH, Y95A</sup> , Ap <sup>r</sup> ,                          | This study |
| pFY-6424   |      | pBAD- <i>vxrA</i> <sup>MH, F117A</sup> , Ap <sup>r</sup> ,                         | This study |
| pFY-6426   |      | pBAD- <i>vxrA</i> <sup>MH, H180A</sup> , Ap <sup>r</sup> ,                         | This study |
| pFY-6427   |      | pBAD- <i>vxrA</i> <sup>MH, D204A</sup> , Ap <sup>r</sup> ,                         | This study |
| pFY-6425   |      | pBAD- <i>vxrA</i> <sup>MH, H139A</sup> , Ap <sup>r</sup> ,                         | This study |

## References

1. Corpet F. 1988. Multiple sequence alignment with hierarchical clustering. *Nucleic Acids Res* 16:10881-90.
2. Gouet P, Courcelle E, Stuart DI, Metz F. 1999. ESPript: analysis of multiple sequence alignments in PostScript. *Bioinformatics* 15:305-8.
3. Tian W, Chen C, Lei X, Zhao J, Liang J. 2018. CASTp 3.0: computed atlas of surface topography of proteins. *Nucleic Acids Res* 46:W363-W367.
4. Herrero M, de Lorenzo V, Timmis KN. 1990. Transposon vectors containing non-antibiotic resistance selection markers for cloning and stable chromosomal insertion of foreign genes in gram-negative bacteria. *J Bacteriol* 172:6557-67.
5. de Lorenzo V, Timmis KN. 1994. Analysis and construction of stable phenotypes in gram-negative bacteria with Tn5- and Tn10-derived minitransposons. *Methods Enzymol* 235:386-405.



6. Cheng AT, Ottemann KM, Yildiz FH. 2015. *Vibrio cholerae* response regulator VxB controls colonization and regulates the Type VI Secretion System. PLoS Pathog 11:e1004933.
7. Bao Y, Lies DP, Fu H, Roberts GP. 1991. An improved Tn7-based system for the single-copy insertion of cloned genes into chromosomes of gram-negative bacteria. Gene 109:167-8.
